# Supplementary material for: Whole-exome sequencing for high-risk primary prostatic extra-gastrointestinal stromal tumor: A case report
Source: PubMed Central journal article supplement — Mol Clin Oncol. 2021 Oct 1;15(6):249. doi: 10.3892/mco.2021.2411 (PMC8521387; doi:10.3892/mco.2021.2411), 2021-10-01
Supplement: Supplementary_Data.pdf [file Supplementary_Data.pdf]

Table SI. Pathways identified from the mutated genes/proteins analyzed using the ConsensusPathDB database.

| Pathway name                                                             | Number of genes size | Number of candidate genes (%) | P-value   | Q-value | Pathway source |
|--------------------------------------------------------------------------|----------------------|-------------------------------|-----------|---------|----------------|
| Receptor-type tyrosine-protein phosphatases                              | 20                   | 6 (30.0)                      | 0.0000422 | 0.0165  | Reactome       |
| The retinoid cycle in cones (daylight vision)                            | 7                    | 4 (57.1)                      | 0.0000453 | 0.0165  | Reactome       |
| The activation of arylsulfatases                                         | 14                   | 5 (38.5)                      | 0.0000493 | 0.0165  | Reactome       |
| Protein-protein interactions at synapses                                 | 88                   | 11 (12.5)                     | 0.0002160 | 0.0539  | Reactome       |
| mRNA surveillance pathway-Homo sapiens (human)                           | 91                   | 11 (12.1)                     | 0.0002910 | 0.0539  | KEGG           |
| $\gamma$ carboxylation, hypusine formation and arylsulfatase activation  | 40                   | 7 (17.9)                      | 0.0003310 | 0.0539  | Reactome       |
| Nucleotide Metabolism                                                    | 19                   | 5 (26.3)                      | 0.0003750 | 0.0539  | Wikipathways   |
| RNA transport-Homo sapiens (human)                                       | 171                  | 15 (8.8)                      | 0.0008690 | 0.0990  | KEGG           |
| Neuronal System                                                          | 368                  | 25 (6.8)                      | 0.0009780 | 0.0990  | Reactome       |
| Rho GTPase cycle                                                         | 144                  | 13 (9.3)                      | 0.0011200 | 0.0990  | Reactome       |
| Biogenic amines are oxidatively deaminated to aldehydes by MAOA and MAOB | 2                    | 2 (100.0)                     | 0.0011900 | 0.0990  | Reactome       |
| Rett syndrome causing genes                                              | 48                   | 7 (14.6)                      | 0.0012100 | 0.0990  | Wikipathways   |
| Ectoderm differentiation                                                 | 142                  | 13 (9.2)                      | 0.0012800 | 0.0990  | Wikipathways   |
| Recycling pathway of L1                                                  | 29                   | 5 (17.9)                      | 0.0024500 | 0.17600 | Reactome       |
| Sodium/proton exchangers                                                 | 9                    | 3 (33.3)                      | 0.0029500 | 0.1760  | Reactome       |
| Death receptor signalling                                                | 141                  | 12 (8.7)                      | 0.0029800 | 0.1760  | Reactome       |
| Pentose phosphate pathway-Homo sapiens (human)                           | 30                   | 5 (16.7)                      | 0.0033600 | 0.1760  | KEGG           |
| Regulation of CDC42 activity                                             | 30                   | 5 (16.7)                      | 0.0033600 | 0.1760  | PID            |
| 5-Phosphoribose 1-diphosphate biosynthesis                               | 3                    | 2 (66.7)                      | 0.0034900 | 0.1760  | Reactome       |
| PRPP biosynthesis                                                        | 3                    | 2 (66.7)                      | 0.0034900 | 0.1760  | HumanCyc       |
| NRAGE signals death through JNK                                          | 61                   | 7 (11.9)                      | 0.0040600 | 0.1800  | Reactome       |
| Putrescine degradation III                                               | 10                   | 3 (30.0)                      | 0.0041000 | 0.1800  | HumanCyc       |
| Opsins                                                                   | 10                   | 3 (30.0)                      | 0.0041000 | 0.1800  | Reactome       |
| Cell death signaling via NRAGE, NRIF and NADE                            | 78                   | 8 (10.5)                      | 0.0046100 | 0.1930  | Reactome       |
| p75 NTR receptor-mediated signaling                                      | 99                   | 9 (9.4)                       | 0.0059000 | 0.2370  | Reactome       |
| Mitochondrial ABC transporters                                           | 4                    | 2 (50.0)                      | 0.0068300 | 0.2370  | Reactome       |
| Amine oxidase reactions                                                  | 4                    | 2 (50.0)                      | 0.0068300 | 0.2370  | Reactome       |
| Ion influx/efflux at host-pathogen interface                             | 4                    | 2 (50.0)                      | 0.0068300 | 0.2370  | Reactome       |
| Wax biosynthesis                                                         | 4                    | 2 (50.0)                      | 0.0068300 | 0.2370  | Reactome       |
| P2Y receptors                                                            | 12                   | 3 (25.0)                      | 0.0071400 | 0.2400  | Reactome       |
| Signaling by Rho GTPases                                                 | 435                  | 25 (5.8)                      | 0.0078400 | 0.2550  | Reactome       |
| Miscellaneous transport and binding events                               | 24                   | 4 (16.7)                      | 0.0086300 | 0.2680  | Reactome       |
| GABA A receptor activation                                               | 13                   | 3 (23.1)                      | 0.0090500 | 0.2680  | Reactome       |
| TRAF6 mediated IRF7 activation in TLR7/8 or 9 signaling                  | 13                   | 3 (23.1)                      | 0.0090500 | 0.2680  | Reactome       |
| Ion channel transport                                                    | 179                  | 13 (7.3)                      | 0.0093000 | 0.2680  | Reactome       |
| Celecoxib pathway, pharmacodynamics                                      | 58                   | 4 (6.9)                       | 0.0002350 | 0.0351  | PharmGKB       |
| Sympathetic nerve pathway (pre- and post-ganglionic junction)            | 12                   | 2 (16.7)                      | 0.0017200 | 0.0626  | PharmGKB       |
| Presynaptic depolarization and calcium channel opening                   | 13                   | 2 (15.4)                      | 0.0020300 | 0.0626  | Reactome       |
| GPCR dopamine D1-like receptor                                           | 50                   | 3 (6.0)                       | 0.0022500 | 0.0626  | INOH           |
| Vitamin B12 metabolism                                                   | 51                   | 3 (5.9)                       | 0.0023900 | 0.0626  | Wikipathways   |
| Chromatin modifying enzymes                                              | 272                  | 6 (2.2)                       | 0.0029400 | 0.0626  | Reactome       |
| Chromatin organization                                                   | 272                  | 6 (2.2)                       | 0.0029400 | 0.0626  | Reactome       |
| HH-Ncore                                                                 | 20                   | 2 (10.0)                      | 0.0048300 | 0.0799  | Signalink      |
| Canonical Wnt signaling pathway                                          | 20                   | 2 (10.0)                      | 0.0048300 | 0.0799  | PID            |
| Termination of O-glycan biosynthesis                                     | 26                   | 2 (7.7)                       | 0.0080900 | 0.1150  | Reactome       |
| Phase 2-plateau phase                                                    | 28                   | 2 (7.1)                       | 0.0093400 | 0.1150  | Reactome       |
| Selenium micronutrient network                                           | 83                   | 3 (3.6)                       | 0.0093500 | 0.1150  | Wikipathways   |

PID, Pathway Interaction Database; HumanCyc, Encyclopedia of Human Genes and Metabolism; PharmGKB, Pharmacogenomics Knowledge Base; INOH, Integrating Network Objects with Hierarchies.

Table SII. Therapeutic candidate drugs predicted using the mutated genes.

| Gene                                                                                                                                                                                                                                                                                                                                                                                                                                                                                     | FDA approved drug candidates (Score >10)                                                                                      |
|------------------------------------------------------------------------------------------------------------------------------------------------------------------------------------------------------------------------------------------------------------------------------------------------------------------------------------------------------------------------------------------------------------------------------------------------------------------------------------------|-------------------------------------------------------------------------------------------------------------------------------|
| c-KIT                                                                                                                                                                                                                                                                                                                                                                                                                                                                                    | Imatinib (98)<br>Sunitinib (46)<br>Dasatinib (45)<br>Sorafenib (35)<br>Nilotinib (27)<br>Regorafenib (19)<br>Ponatinib (11)   |
| AR                                                                                                                                                                                                                                                                                                                                                                                                                                                                                       | Nilutamide (17)<br>Flutamide (16)<br>Bicalutamide (15)<br>Fluoxymesterone (12)<br>Methyltestosterone (10)<br>Oxandrolone (10) |
| AVPR2                                                                                                                                                                                                                                                                                                                                                                                                                                                                                    | Conivaptan (17)<br>Vasopressin (11)                                                                                           |
| MAOB                                                                                                                                                                                                                                                                                                                                                                                                                                                                                     | Pargyline (16)                                                                                                                |
| CLCN2                                                                                                                                                                                                                                                                                                                                                                                                                                                                                    | Lubiprostone (14)                                                                                                             |
| HTR2C                                                                                                                                                                                                                                                                                                                                                                                                                                                                                    | Olanzapine (13)<br>Mirtazapine (11)                                                                                           |
| POLA1                                                                                                                                                                                                                                                                                                                                                                                                                                                                                    | Clofarabine (13)                                                                                                              |
| BTK                                                                                                                                                                                                                                                                                                                                                                                                                                                                                      | Ibrutinib (13)                                                                                                                |
| GSR                                                                                                                                                                                                                                                                                                                                                                                                                                                                                      | Carmustine (12)                                                                                                               |
| CYSLTR1                                                                                                                                                                                                                                                                                                                                                                                                                                                                                  | Zafirlukast (12)                                                                                                              |
| TLR7                                                                                                                                                                                                                                                                                                                                                                                                                                                                                     | Imiquimod (12)                                                                                                                |
| APOB                                                                                                                                                                                                                                                                                                                                                                                                                                                                                     | Atorvastatin (10)                                                                                                             |
| ARAF                                                                                                                                                                                                                                                                                                                                                                                                                                                                                     | Sorafenib (10)                                                                                                                |
| BCHE, L3RA, ASMT, STS, GPR143, ELK1, SLC38A5, EBP, GATA1, HDAC6, KCND1, SYP, CACNA1F, FOXP3, TSPYL2, ALAS2, SLC7A3, IL2RG, HDAC8, ATRX, COX7B, ATP7A, LPAR4, SYTL4, TSC22D3, PSMD10, COL4A6, COL4A5, GUCY2F, TRPC5, AGTR2, NDUFA1, GRIA3, XIAP, STAG2, AIFM1, GPR119, HPRT1, CD40LG, F9, IDS, CNGA2, GABRE, GABRA3, GABRQ, MAGEA1, G6PD, MECP2, NR0B1, DMD, OTC, BCOR, MAOA, NDUFB11, TNK2, LRP2, GJB5, CACNA1E, DCP1B, KDM6B, HTT, MUC2, CACNA1D, ARID1A, PI4K2A, KCNQ3, CACNA2D1, IFNG | Not applicable                                                                                                                |

FDA, food and drug administration.
